# Supplementary material
Source: PubMed Central journal article supplement (PMC4325140)
Supplement: AEM.03795-14_zam999116066so1.pdf [file AEM.03795-14_zam999116066so1.pdf]

## SUPPLEMENTARY INFORMATION

### Genetic tools for the industrially promising methanotroph

#### *Methylomicrobium buryatense*

Aaron W. Puri<sup>1#</sup>, Sarah Owen<sup>1</sup>, Frances Chu<sup>1</sup>, Ted Chavkin<sup>1+</sup>, David A. C. Beck<sup>1,2</sup>,

Marina G. Kalyuzhnaya<sup>1</sup>, and Mary E. Lidstrom<sup>1,3</sup>

<sup>1</sup>Department of Chemical Engineering, University of Washington, Seattle, Washington, USA

<sup>2</sup>eScience Institute, University of Washington, Seattle, Washington, USA

<sup>3</sup>Department of Microbiology, University of Washington, Seattle, Washington, USA

#Corresponding author: awpuri@uw.edu

+Current address: REG Life Sciences, South San Francisco, CA

Supplementary Figures

**Fig S1.** Growth curves and doubling times for *M. buryatense* strains 5GB1, 5GB1S, and 5GB1C. Data represents the mean of 3 replicates  $\pm$  standard deviation.

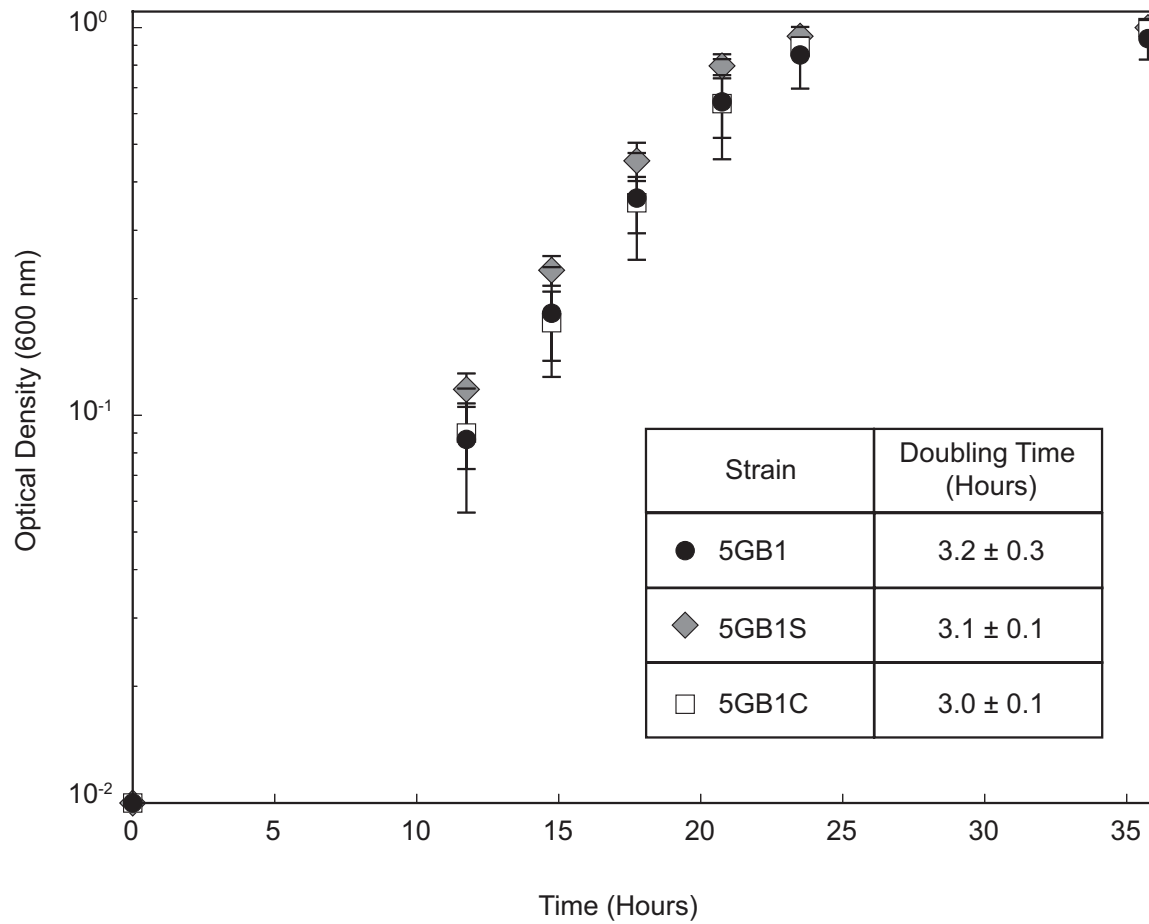

**Fig S2.** Diagnostic PCR showing native plasmid loss in *M. buryatense* 5GB1S and 5GB1C compared to 5GB1. PCR A: Chromosomal locus positive control (expected size: 621 bp), PCRs B-D: 3 native plasmid loci (expected sizes: 590 bp, 640 bp, 635 bp respectively). Primer sequences are listed in Table S1.

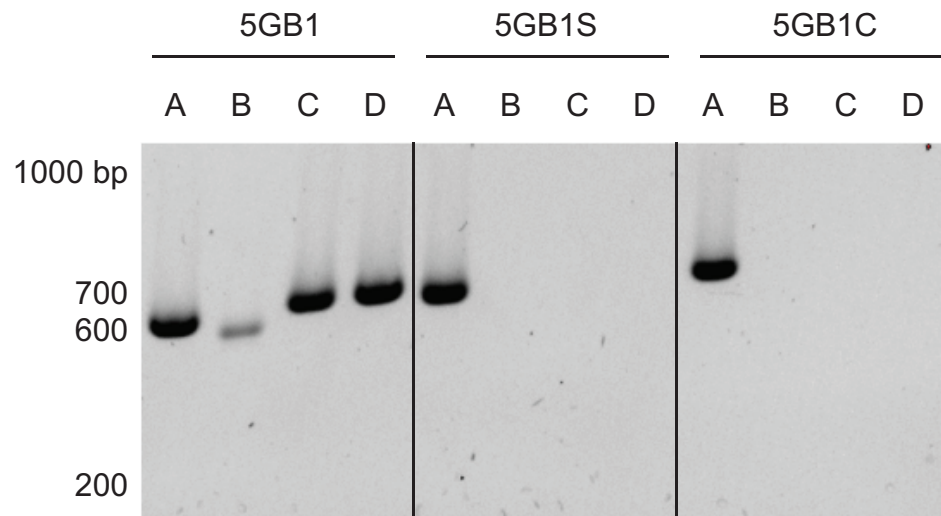

**Fig S3.** IncP-based broad host range vector pCM66. Leftover pieces of antibiotic resistance genes from restriction based cloning methods are shown in red.

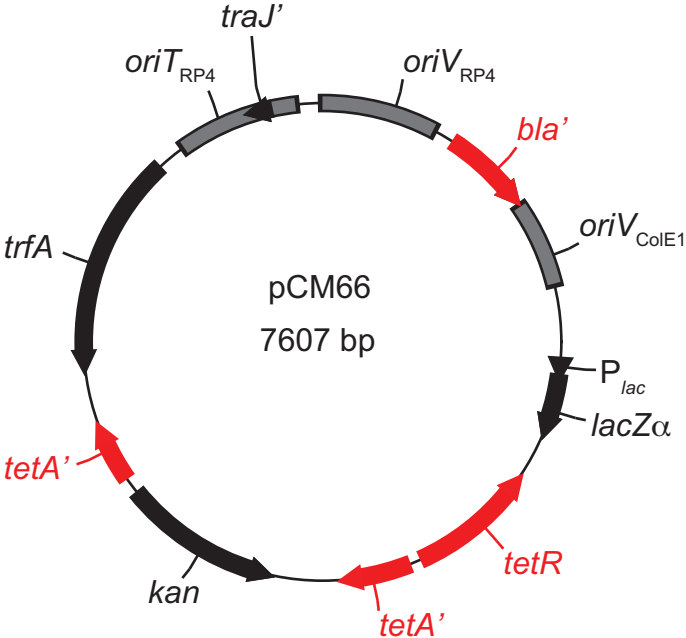

**Fig S4.** Relative promoter strengths in *E. coli*. Fluorescence (Ex 535nm/Em 590nm) was measured in whole *E. coli* TOP10 cells containing probe vectors with promoter-dTomato fusions and normalized to optical density (540 nm). Data represents the mean of 3 replicates  $\pm$  standard deviation.

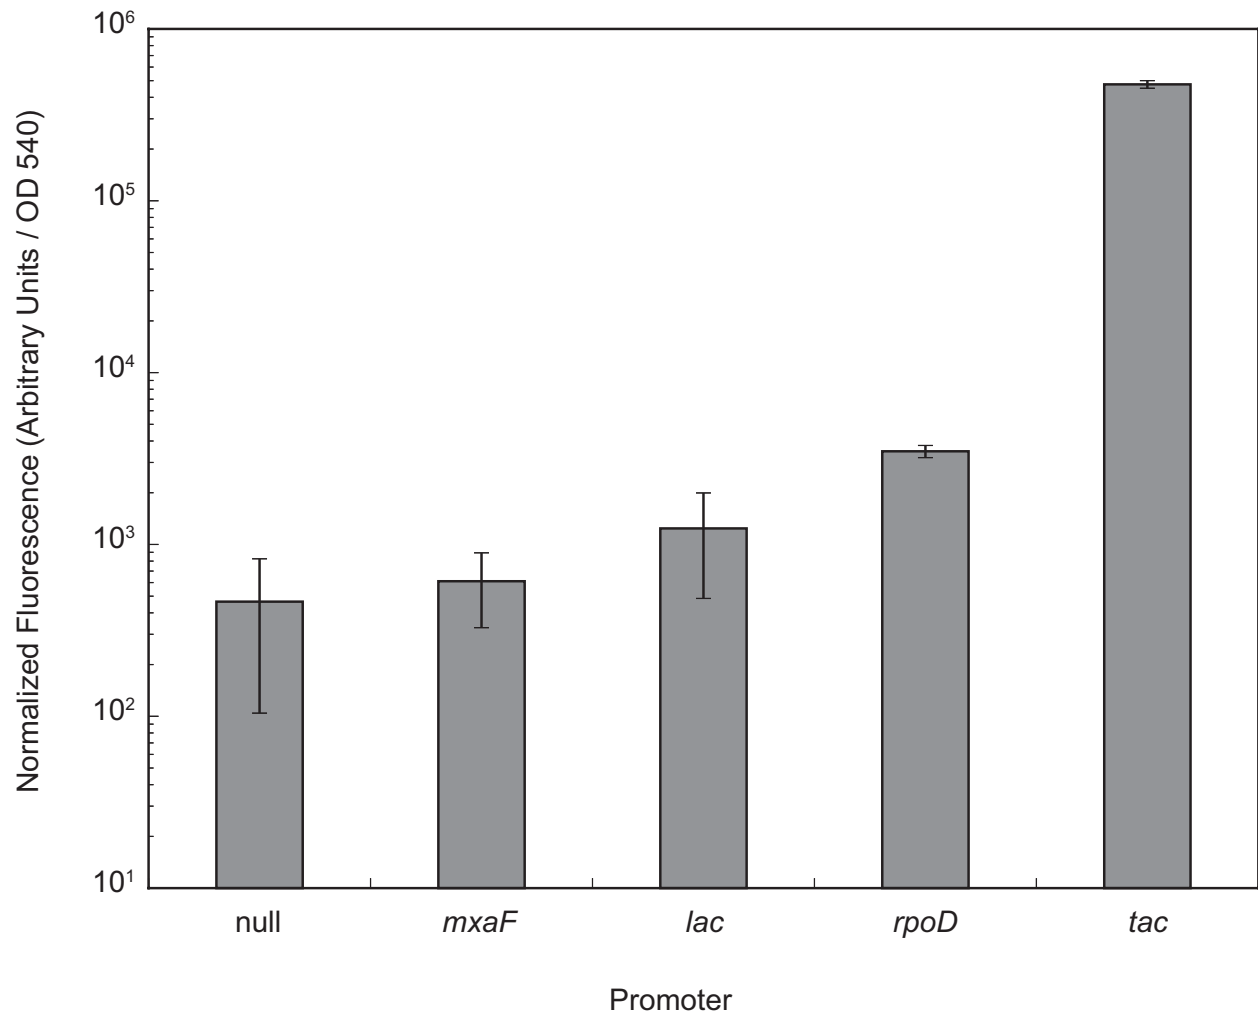

Supplementary Tables

**Table S1.** Selected primers used in this study. Homology regions used for Gibson Assembly are underlined.

| Primer Name           | Sequence (5' to 3')                                                              | Description                                                                                                                     |
|-----------------------|----------------------------------------------------------------------------------|---------------------------------------------------------------------------------------------------------------------------------|
| AP186_pCM433kanT_fwd1 | ATGTGCAGGTTGTCGGTGTC                                                             | For amplifying pCM433kanT backbone.                                                                                             |
| AP187_pCM433kanT_rev1 | TGGTAACTGTCAGACCAAGTTTAC<br>TC                                                   |                                                                                                                                 |
| AP259_pAWP78_fwd1     | TTGTCCGGGAAGATGCGTGAT                                                            | For amplifying pAWP78 backbone.                                                                                                 |
| AP254_pAWP78_rev1     | CAGCTCACTCAAAGGCGGTA                                                             |                                                                                                                                 |
| AP88_433kanRvect_fwd1 | TACGTACGCGTGTTAACCGG                                                             | For amplifying <i>glgA</i> knockout vector backbones.                                                                           |
| AP89_433kanRvect_rev1 | AGCTGCAGCATATGCATCCA                                                             |                                                                                                                                 |
| AP90_glgA1_Up_fwd1    | <u>TGGATGCATATGCTGCAGCTGAGT</u><br><u>TCGGGCAAGGTACAGA</u>                       | For amplifying flanks to knock out glycogen synthase <i>glgA1</i> (METBUDRAFT_3833 / MBURv2_210177) with pAWP45.                |
| AP91_glgA1_Up_rev1    | <u>GAACTCTCCAGGCAGTCAA</u> <u>AATTC</u><br><u>GGTTCTAG</u>                       |                                                                                                                                 |
| AP92_glgA1_Dwn_fwd1   | <u>TTTGACTGCCTGGAGAGTTCGGTA</u><br><u>ACTCGATTG</u>                              |                                                                                                                                 |
| AP93_glgA1_Dwn_rev1   | <u>CCGGTAAACACGCGTACGTATGTG</u><br><u>GAATTACCGGAAGGCA</u>                       |                                                                                                                                 |
| AP94_glgA2_Up_fwd1    | <u>TGGATGCATATGCTGCAGCTAGTT</u><br><u>GGGGCGAACAAGGCTA</u>                       | For amplifying flanks to knock out glycogen synthase <i>glgA1</i> (METBUDRAFT_3841 / MBURv2_210185) with pAWP47.                |
| AP95_glgA2_Up_rev1    | <u>ATCGGCCTCTATTTATCATCCCGCT</u><br><u>GCCCTTAG</u>                              |                                                                                                                                 |
| AP96_glgA2_Dwn_fwd1   | <u>GATGATAAATAGAGGCCGATTGAT</u><br><u>GAGGAT</u>                                 |                                                                                                                                 |
| AP97_glgA2_Dwn_rev1   | <u>CCGGTAAACACGCGTACGTAGCAA</u><br><u>ATAAACGAGGCGTATC</u>                       |                                                                                                                                 |
| AP339_repAB_Up_fwd1   | <u>ATATGAGTAACTTGGTCTGACAG</u><br><u>TTACCAAGATCTGCGGATTTAGGT</u><br><u>CATG</u> | For amplifying flanks to knock out <i>repA</i> (METBUDRAFT_0076 / MBURv2_10076) to <i>repB</i> (METBUDRAFT_0086 / MBURv2_10086) |
| AP340_repAB_Up_rev1   | <u>TCGGAACCTGCCAATGGCAATTTC</u><br><u>CTATCTTTTGG</u>                            |                                                                                                                                 |
| AP341_repAB_Dwn_fwd1  | <u>AGATAGGAAATTGCCATTGGCAGG</u><br><u>TTCCGACCCAT</u>                            |                                                                                                                                 |
| AP342_repAB_Dwn_rev1  | <u>CGTGCATCACGACACCGACAACCT</u><br><u>GCACATGGTATTAAGTTCGCATC</u>                |                                                                                                                                 |

|                         |                                       |                                                     |
|-------------------------|---------------------------------------|-----------------------------------------------------|
|                         | AATAGCTTC                             | native plasmid locus using pAWP93.                  |
| AP1_plasdiagPCRA_fwd1   | GAGGACGTCCACAGCGGCTTTGAC<br>TGGATCG   | For native plasmid loss diagnostic PCR (Figure S2). |
| AP4_plasdiagPCRA_rev1   | GAGGAGCTCCGTCAAAGGACGCCG<br>TGAGCCCAG |                                                     |
| AP346_plasdiagPCRB_fwd1 | AATCCGTCCCATGAGCCTTCCC                |                                                     |
| AP347_plasdiagPCRB_rev1 | CCCAACAAGGCTAATGCAGC                  |                                                     |
| AP348_plasdiagPCRC_fwd1 | TTATCCCGAAGGCGAAACATGC                |                                                     |
| AP349_plasdiagPCRC_rev1 | GCACTCTAGCGACAAATATCCGA               |                                                     |
| AP350_plasdiagPCRD_fwd1 | AAGGCCGCACAGGAAGTTCG                  |                                                     |
| AP351_plasdiagPCRD_rev1 | GACGGTTACATCCCTGACGCGA                |                                                     |

**Table S2.** Promoter sequences for dTomato probe vectors. The ATG start codon of dTomato occurs immediately following these sequences in each plasmid.

| Promoter                                                                      | Sequence (5' to 3')                                                                                                                                                                                                                                                                                                                              | dTomato reporter plasmid containing promoter |
|-------------------------------------------------------------------------------|--------------------------------------------------------------------------------------------------------------------------------------------------------------------------------------------------------------------------------------------------------------------------------------------------------------------------------------------------|----------------------------------------------|
| <i>lac</i>                                                                    | CCAGGCTTTACACTTTATGCTTCCGGCTCGTA<br>TGTTGTGTGGAGGTATTCACACAGGAAACAG<br>CT                                                                                                                                                                                                                                                                        | pAWP88                                       |
| <i>tac</i>                                                                    | CTCTGAAATGAGCTGTTGACAATTAATCATC<br>GGCTCGTATAATGTGTGGAGGTATTCACACA<br>GGAAACAGCT                                                                                                                                                                                                                                                                 | pAWP89                                       |
| 300 bp upstream of<br><i>rpoD</i><br>(METBUDRAFT_<br>3024 /<br>MBURv2_160101) | GGACGACACAGCGAGAAAGTTGTGAAGCAA<br>CTGGTTTTTTTGGATGTGATGGTTCCCGAGGA<br>AGGGGTTTCGTGCCGAATTTTCAGACGCTTTG<br>GAACGATTGAATGCGCAAGCGAGAGAAGGT<br>CGTATTGAGCAGTTATTAGAAAAAGAGTCGG<br>CGGAAGGCTTAAGTCGAGAGGAGCGGGAAA<br>TATTAGGGAGGTTACTGGTAAGCCGATAAAA<br>GGGAATTCGTATTAACATAAAAAAGAATATG<br>TTGTATAATTTCTGTTCAGCGTAATTGTGCT<br>GATCGTATTCTGTGAGTGAGTG | pAWP92                                       |
| 300 bp upstream of<br><i>mxoF</i><br>(METBUDRAFT_<br>3941 /<br>MBURv2_210291) | AATTAAACCGGGAATGATGTCCGGATATTTAA<br>CGGCAAAGCCATGGGAGCTTTTCCCGAATTT<br>GAATGCCGACATACTCTCGGGATATTTCCCT<br>GTTTTTTCTTAGCGCTTTTCCCGTCATCTGGG<br>TGCTGTATTCCGTAACGTCGCATCCCGCTCCT<br>TCCGTATGATTACCGTCCGTGCGCTGCCCTCT<br>ATGAATGATTTCGTTATGCGCCTTGATCAAGCT<br>AAGCCGGTTGTAACAACAACACCGCAATCA<br>ATAGGGGGCCGCGCCGACATTATGCGAAAAA<br>TCAATCTGGAGGAATT | pAWP87                                       |



**Table S3.** Genotypic differences of *Methylomicrobium buryatense* 5GB1 compared to published *Methylomicrobium buryatense* 5G genome (NCBI accession AOTL01000000).

In addition to the listed genotypic differences, we also discovered that the 5GB1 genome contains a 309 bp transposon insertion in the sigma factor gene *rpoS*, leading to a truncated 218 amino acid RpoS product.

See next page for table.

Predicted mutations

| evidence              | position  | mutation  | annotation              | gene                                            | description                                                                                                                                                                                                                                  |
|-----------------------|-----------|-----------|-------------------------|-------------------------------------------------|----------------------------------------------------------------------------------------------------------------------------------------------------------------------------------------------------------------------------------------------|
| <a href="#">JC</a>    | 140,502   | +GGAAAGA  | intergenic (+16/-404)   | <i>MBURv2_20047</i> → / → <i>MBURv2_20048</i>   | Peptidase S1 and S6, chymotrypsin/Hap/Undecaprenyl-phosphate galactosephosphotransferase                                                                                                                                                     |
| <a href="#">RA</a>    | 393,809   | G→T       | Q341K (CAA→AAA)         | <i>MBURv2_20291</i> ←                           | conserved exported protein of unknown function                                                                                                                                                                                               |
| <a href="#">JC</a>    | 431,236   | +ACCGCTT  | coding (162/279 nt)     | <i>MBURv2_20329</i> →                           | membrane protein of unknown function                                                                                                                                                                                                         |
| <a href="#">RA</a>    | 580,112   | +TTCACTA  | intergenic (+135/+104)  | <i>MBURv2_20468</i> → / ← <i>pgm</i>            | Zinc/iron permease/Phosphoglucosmutase                                                                                                                                                                                                       |
| <a href="#">JC</a>    | 667,699   | Δ21 bp    | intergenic (+70/-72)    | <i>MBURv2_30052</i> → / → <i>MBURv2_30053</i>   | conserved protein of unknown function/conserved hypothetical protein                                                                                                                                                                         |
| <a href="#">JC</a>    | 676,649   | 56 bp x 2 | duplication             | <i>MBURv2_30060</i> → / → <i>MBURv2_30061</i>   | GTP-binding protein HSR1-related protein/protein of unknown function                                                                                                                                                                         |
| <a href="#">JC</a>    | 770,914   | Δ21 bp    | intergenic (+799/-119)  | <i>MBURv2_30133</i> → / → <i>cas2</i>           | conserved exported protein of unknown function/CRISPR-associated endoribonuclease Cas2 1                                                                                                                                                     |
| <a href="#">RA</a>    | 780,024   | C→T       | A198V (GCC→GIC)         | <i>MBURv2_30144</i> →                           | conserved protein of unknown function                                                                                                                                                                                                        |
| <a href="#">RA</a>    | 810,254   | T→G       | F1000L (TTI→TTG)        | <i>MBURv2_30169</i> →                           | Linear gramicidin synthase subunit D [Includes: ATP-dependent D-leucine adenylase ; Leucine racemase [ATP-hydrolyzing] ; ATP-dependent tryptophan adenylase ; ATP-dependent glycine adenylase ; Linear gramicidin--PCP reductase] (fragment) |
| <a href="#">RA</a>    | 863,269   | A→G       | intergenic (+65/-471)   | <i>MBURv2_50037</i> → / → <i>rbgA</i>           | conserved protein of unknown function/Ribosome biogenesis GTPase A                                                                                                                                                                           |
| <a href="#">RA</a>    | 863,356   | G→T       | intergenic (+152/-384)  | <i>MBURv2_50037</i> → / → <i>rbgA</i>           | conserved protein of unknown function/Ribosome biogenesis GTPase A                                                                                                                                                                           |
| <a href="#">RA</a>    | 863,363   | G→T       | intergenic (+159/-377)  | <i>MBURv2_50037</i> → / → <i>rbgA</i>           | conserved protein of unknown function/Ribosome biogenesis GTPase A                                                                                                                                                                           |
| <a href="#">JC</a>    | 924,720   | Δ7 bp     | intergenic (+214/-72)   | <i>MBURv2_50095</i> → / → <i>MBURv2_50096</i>   | conserved protein of unknown function/Sugar transferase, PEP-CTERM/EpsH1 system associated                                                                                                                                                   |
| <a href="#">RA</a>    | 949,136   | C→T       | G57G (GGC→GGI)          | <i>MBURv2_50113</i> →                           | OmpA family protein                                                                                                                                                                                                                          |
| <a href="#">RA</a>    | 949,141   | 2 bp→TC   | coding (176-177/831 nt) | <i>MBURv2_50113</i> →                           | OmpA family protein                                                                                                                                                                                                                          |
| <a href="#">RA</a>    | 949,146   | G→C       | D61H (GAT→CAT)          | <i>MBURv2_50113</i> →                           | OmpA family protein                                                                                                                                                                                                                          |
| <a href="#">RA</a>    | 949,148   | 3 bp→GAA  | coding (183-185/831 nt) | <i>MBURv2_50113</i> →                           | OmpA family protein                                                                                                                                                                                                                          |
| <a href="#">RA</a>    | 949,163   | T→G       | D66E (GAT→GAG)          | <i>MBURv2_50113</i> →                           | OmpA family protein                                                                                                                                                                                                                          |
| <a href="#">RA</a>    | 997,352   | N→G       | ?89K (AAN→AAG)          | <i>MBURv2_50154</i> →                           | transposase                                                                                                                                                                                                                                  |
| <a href="#">RA</a>    | 1,105,229 | N→C       | ?172P (CNG→CCG)         | <i>MBURv2_50241</i> →                           | conserved protein of unknown function                                                                                                                                                                                                        |
| <a href="#">RA</a>    | 1,421,698 | Δ1 bp     | coding (9/144 nt)       | <i>MBURv2_60051</i> →                           | protein of unknown function                                                                                                                                                                                                                  |
| <a href="#">JC</a>    | 1,516,562 | Δ12 bp    | coding (783-794/993 nt) | <i>MBURv2_60136</i> ←                           | conserved protein of unknown function                                                                                                                                                                                                        |
| <a href="#">RA</a>    | 1,517,657 | Δ1 bp     | coding (55/156 nt)      | <i>MBURv2_60137</i> →                           | protein of unknown function                                                                                                                                                                                                                  |
| <a href="#">RA</a>    | 1,519,665 | C→T       | E310E (GAG→GAA)         | <i>MBURv2_60142</i> ←                           | transposase                                                                                                                                                                                                                                  |
| <a href="#">RA</a>    | 1,519,668 | G→A       | I309I (ATC→ATI)         | <i>MBURv2_60142</i> ←                           | transposase                                                                                                                                                                                                                                  |
| <a href="#">RA</a>    | 1,536,111 | N→T       | ?422G (GGN→GGI)         | <i>dxs</i> →                                    | 1-deoxyxylulose-5-phosphate synthase, thiamine-requiring, FAD-requiring                                                                                                                                                                      |
| <a href="#">RA</a>    | 1,536,141 | A→C       | A432A (GCA→GCC)         | <i>dxs</i> →                                    | 1-deoxyxylulose-5-phosphate synthase, thiamine-requiring, FAD-requiring                                                                                                                                                                      |
| <a href="#">RA</a>    | 1,536,252 | N→T       | ?469G (GGN→GGI)         | <i>dxs</i> →                                    | 1-deoxyxylulose-5-phosphate synthase, thiamine-requiring, FAD-requiring                                                                                                                                                                      |
| <a href="#">RA</a>    | 1,684,299 | Δ1 bp     | intergenic (+82/-477)   | <i>MBURv2_60281</i> → / → <i>MBURv2_60282</i>   | Retron-type reverse transcriptase (fragment)/transposase                                                                                                                                                                                     |
| <a href="#">RA</a>    | 1,712,205 | N→T       | ?151L (CTN→CTI)         | <i>umuC</i> →                                   | DNA polymerase V, subunit C                                                                                                                                                                                                                  |
| <a href="#">RA</a>    | 1,712,263 | N→T       | ?171L (NTN→ITA)         | <i>umuC</i> →                                   | DNA polymerase V, subunit C                                                                                                                                                                                                                  |
| <a href="#">RA</a>    | 1,712,265 | N→A       | ?171L (NTN→TTA)         | <i>umuC</i> →                                   | DNA polymerase V, subunit C                                                                                                                                                                                                                  |
| <a href="#">MC JC</a> | 1,815,401 | Δ118 bp   | intergenic (-227/+445)  | <i>MBURv2_60409</i> ← / ← <i>MBURv2_70001</i>   | protein of unknown function/Plasmid stabilization system                                                                                                                                                                                     |
| <a href="#">MC JC</a> | 1,817,604 | Δ150 bp   |                         | [ <i>MBURv2_80001</i> ]                         | [ <i>MBURv2_80001</i> ]                                                                                                                                                                                                                      |
| <a href="#">RA</a>    | 2,126,951 | N→G       | ?191C (TNT→TGT)         | <i>MBURv2_120134</i> →                          | conserved protein of unknown function                                                                                                                                                                                                        |
| <a href="#">RA</a>    | 2,228,653 | C→T       | G199G (GGC→GGI)         | <i>yhhI</i> →                                   | H repeat-associated protein YhhI                                                                                                                                                                                                             |
| <a href="#">RA</a>    | 2,254,116 | N→C       | ?386C (TNT→TGT)         | <i>MBURv2_130091</i> ←                          | conserved protein of unknown function                                                                                                                                                                                                        |
| <a href="#">JC</a>    | 2,271,543 | Δ97 bp    | intergenic (-562/+115)  | <i>MBURv2_130105</i> ← / ← <i>MBURv2_130106</i> | Multicopper oxidase type 3/Disulfide bond isomerase, DsbC/G-like protein                                                                                                                                                                     |
| <a href="#">RA</a>    | 2,430,526 | Δ1 bp     | intergenic (-118/+114)  | <i>MBURv2_130232</i> ← / ← <i>fljI</i>          | Flagellar export protein FljI/flagellum-specific ATP synthase<br>Flagellar export protein FljI/flagellum-specific ATP                                                                                                                        |

|                    |           |          |                                            |                                                 |                                                                                                            |
|--------------------|-----------|----------|--------------------------------------------|-------------------------------------------------|------------------------------------------------------------------------------------------------------------|
| <a href="#">RA</a> | 2,430,528 | Δ1 bp    | intergenic (-120/+112)                     | <i>MBURv2_130232</i> ← / ← <i>flil</i>          | synthase                                                                                                   |
| <a href="#">RA</a> | 2,430,531 | 2 bp→G   | intergenic (-123/+108)                     | <i>MBURv2_130232</i> ← / ← <i>flil</i>          | Flagellar export protein FliJ/flagellum-specific ATP synthase                                              |
| <a href="#">RA</a> | 2,430,534 | 3 bp→GCG | intergenic (-126/+104)                     | <i>MBURv2_130232</i> ← / ← <i>flil</i>          | Flagellar export protein FliJ/flagellum-specific ATP synthase                                              |
| <a href="#">RA</a> | 2,430,538 | A→C      | intergenic (-130/+102)                     | <i>MBURv2_130232</i> ← / ← <i>flil</i>          | Flagellar export protein FliJ/flagellum-specific ATP synthase                                              |
| <a href="#">RA</a> | 2,430,541 | 2 bp→TT  | intergenic (-133/+98)                      | <i>MBURv2_130232</i> ← / ← <i>flil</i>          | Flagellar export protein FliJ/flagellum-specific ATP synthase                                              |
| <a href="#">RA</a> | 2,430,544 | G→A      | intergenic (-136/+96)                      | <i>MBURv2_130232</i> ← / ← <i>flil</i>          | Flagellar export protein FliJ/flagellum-specific ATP synthase                                              |
| <a href="#">RA</a> | 2,430,546 | A→C      | intergenic (-138/+94)                      | <i>MBURv2_130232</i> ← / ← <i>flil</i>          | Flagellar export protein FliJ/flagellum-specific ATP synthase                                              |
| <a href="#">RA</a> | 2,430,549 | G→C      | intergenic (-141/+91)                      | <i>MBURv2_130232</i> ← / ← <i>flil</i>          | Flagellar export protein FliJ/flagellum-specific ATP synthase                                              |
| <a href="#">RA</a> | 2,430,551 | Δ3 bp    | intergenic (-143/+87)                      | <i>MBURv2_130232</i> ← / ← <i>flil</i>          | Flagellar export protein FliJ/flagellum-specific ATP synthase                                              |
| <a href="#">RA</a> | 2,430,555 | Δ1 bp    | intergenic (-147/+85)                      | <i>MBURv2_130232</i> ← / ← <i>flil</i>          | Flagellar export protein FliJ/flagellum-specific ATP synthase                                              |
| <a href="#">RA</a> | 2,430,558 | G→C      | intergenic (-150/+82)                      | <i>MBURv2_130232</i> ← / ← <i>flil</i>          | Flagellar export protein FliJ/flagellum-specific ATP synthase                                              |
| <a href="#">RA</a> | 2,460,123 | C→A      | intergenic (-369/+110)                     | <i>bamA</i> ← / ← <i>MBURv2_130262</i>          | Outer membrane protein assembly factor BamA/AFG1-family ATPase                                             |
| <a href="#">JC</a> | 2,477,643 | Δ49 bp   | intergenic (-68/+240)                      | <i>MBURv2_130276</i> ← / ← <i>MBURv2_130277</i> | conserved protein of unknown function/putative virion core protein (Lumpy skin disease virus)-like protein |
| <a href="#">RA</a> | 2,593,133 | Δ1 bp    | coding (775/795 nt)                        | <i>MBURv2_130386</i> →                          | protein of unknown function                                                                                |
| <a href="#">RA</a> | 2,663,596 | G→T      | H532N (C <u>A</u> C→ <u>A</u> AC)          | <i>rpoB</i> ←                                   | RNA polymerase, beta subunit                                                                               |
| <a href="#">JC</a> | 2,703,485 | Δ49 bp   | intergenic (-347/+336)                     | <i>MBURv2_130501</i> ← / ← <i>ectC</i>          | Tetratricopeptide repeat domain protein/L-ectoine synthase                                                 |
| <a href="#">RA</a> | 2,718,814 | N→T      | intergenic (-599/-275)                     | <i>MBURv2_130515</i> ← / → <i>MBURv2_130516</i> | conserved exported protein of unknown function/Retron-type reverse transcriptase                           |
| <a href="#">JC</a> | 2,758,218 | Δ49 bp   | intergenic (+325/-123)                     | <i>MBURv2_130543</i> → / → <i>MBURv2_130544</i> | conserved protein of unknown function/conserved protein of unknown function                                |
| <a href="#">RA</a> | 2,939,318 | Δ2 bp    | intergenic (+162/+98)                      | <i>ispH</i> → / ← <i>MBURv2_130718</i>          | 1-hydroxy-2-methyl-2-(E)-butenyl 4-diphosphate reductase, 4Fe-4S protein/putative TrkA-N domain protein    |
| <a href="#">RA</a> | 3,243,751 | Δ1 bp    | intergenic (+15/-154)                      | <i>umuC</i> → / → <i>MBURv2_130990</i>          | DNA polymerase V, subunit C/conserved protein of unknown function                                          |
| <a href="#">RA</a> | 3,402,031 | G→C      | P136A (C <u>C</u> T→ <u>G</u> C <u>T</u> ) | <i>MBURv2_160132</i> ←                          | conserved protein of unknown function                                                                      |
| <a href="#">RA</a> | 3,908,877 | N→T      | ?309I (AT <u>N</u> →AT <u>I</u> )          | <i>MBURv2_170001</i> →                          | transposase                                                                                                |
| <a href="#">RA</a> | 3,908,880 | N→A      | ?310E (GA <u>N</u> →GA <u>A</u> )          | <i>MBURv2_170001</i> →                          | transposase                                                                                                |
| <a href="#">RA</a> | 3,912,896 | A→G      | I46I (AT <u>I</u> →AT <u>C</u> )           | <i>MBURv2_170005</i> ←                          | protein of unknown function                                                                                |
| <a href="#">RA</a> | 3,912,899 | G→C      | V45V (GT <u>C</u> →GT <u>G</u> )           | <i>MBURv2_170005</i> ←                          | protein of unknown function                                                                                |
| <a href="#">RA</a> | 3,912,921 | A→G      | I38T (A <u>T</u> A→A <u>C</u> A)           | <i>MBURv2_170005</i> ←                          | protein of unknown function                                                                                |
| <a href="#">RA</a> | 3,939,410 | C→G      | T1285T (AC <u>G</u> →AC <u>C</u> )         | <i>MBURv2_190001</i> ←                          | LPXTG-motif cell wall anchor domain protein (fragment)                                                     |
| <a href="#">RA</a> | 3,939,464 | T→G      | S1267S (TC <u>A</u> →TC <u>C</u> )         | <i>MBURv2_190001</i> ←                          | LPXTG-motif cell wall anchor domain protein (fragment)                                                     |
| <a href="#">RA</a> | 3,939,466 | 2 bp→TA  | coding (3798-3799/3963 nt)                 | <i>MBURv2_190001</i> ←                          | LPXTG-motif cell wall anchor domain protein (fragment)                                                     |
| <a href="#">RA</a> | 3,939,482 | C→G      | T1261T (AC <u>G</u> →AC <u>C</u> )         | <i>MBURv2_190001</i> ←                          | LPXTG-motif cell wall anchor domain protein (fragment)                                                     |
| <a href="#">RA</a> | 3,939,497 | G→A      | D1256D (GA <u>C</u> →GA <u>T</u> )         | <i>MBURv2_190001</i> ←                          | LPXTG-motif cell wall anchor domain protein (fragment)                                                     |
| <a href="#">RA</a> | 3,939,503 | G→A      | D1254D (GA <u>C</u> →GA <u>T</u> )         | <i>MBURv2_190001</i> ←                          | LPXTG-motif cell wall anchor domain protein (fragment)                                                     |
| <a href="#">RA</a> | 3,939,509 | G→A      | D1252D (GA <u>C</u> →GA <u>T</u> )         | <i>MBURv2_190001</i> ←                          | LPXTG-motif cell wall anchor domain protein (fragment)                                                     |
| <a href="#">RA</a> | 3,939,512 | C→G      | T1251T (AC <u>G</u> →AC <u>C</u> )         | <i>MBURv2_190001</i> ←                          | LPXTG-motif cell wall anchor domain protein (fragment)                                                     |
| <a href="#">RA</a> | 3,939,524 | C→G      | T1247T (AC <u>G</u> →AC <u>C</u> )         | <i>MBURv2_190001</i> ←                          | LPXTG-motif cell wall anchor domain protein (fragment)                                                     |
| <a href="#">RA</a> | 3,939,566 | T→G      | T1233T (AC <u>A</u> →AC <u>C</u> )         | <i>MBURv2_190001</i> ←                          | LPXTG-motif cell wall anchor domain protein (fragment)                                                     |
| <a href="#">RA</a> | 3,939,569 | G→A      | D1232D (GA <u>C</u> →GA <u>T</u> )         | <i>MBURv2_190001</i> ←                          | LPXTG-motif cell wall anchor domain protein (fragment)                                                     |
| <a href="#">RA</a> | 3,939,590 | C→G      | T1225T (AC <u>G</u> →AC <u>C</u> )         | <i>MBURv2_190001</i> ←                          | LPXTG-motif cell wall anchor domain protein (fragment)                                                     |
| <a href="#">RA</a> | 3,939,593 | G→A      | D1224D (GA <u>C</u> →GA <u>T</u> )         | <i>MBURv2_190001</i> ←                          | LPXTG-motif cell wall anchor domain protein (fragment)                                                     |
| <a href="#">RA</a> | 3,939,635 | G→A      | D1210D (GA <u>C</u> →GA <u>T</u> )         | <i>MBURv2_190001</i> ←                          | LPXTG-motif cell wall anchor domain protein (fragment)                                                     |
| <a href="#">RA</a> | 3,939,659 | G→A      | D1202D (GA <u>C</u> →GA <u>T</u> )         | <i>MBURv2_190001</i> ←                          | LPXTG-motif cell wall anchor domain protein (fragment)                                                     |
| <a href="#">RA</a> | 3,939,701 | G→A      | D1188D (GA <u>C</u> →GA <u>T</u> )         | <i>MBURv2_190001</i> ←                          | LPXTG-motif cell wall anchor domain protein (fragment)                                                     |
| <a href="#">RA</a> | 3,939,968 | T→G      | T1099T (AC <u>A</u> →AC <u>C</u> )         | <i>MBURv2_190001</i> ←                          | LPXTG-motif cell wall anchor domain protein (fragment)                                                     |
| <a href="#">RA</a> | 3,940,037 | G→A      | D1076D (GA <u>C</u> →GA <u>T</u> )         | <i>MBURv2_190001</i> ←                          | LPXTG-motif cell wall anchor domain protein (fragment)                                                     |
| <a href="#">RA</a> | 3,940,049 | G→A      | D1072D (GA <u>C</u> →GA <u>T</u> )         | <i>MBURv2_190001</i> ←                          | LPXTG-motif cell wall anchor domain protein (fragment)                                                     |
| <a href="#">RA</a> | 3,940,061 | G→A      | D1068D (GA <u>C</u> →GA <u>T</u> )         | <i>MBURv2_190001</i> ←                          | LPXTG-motif cell wall anchor domain protein (fragment)                                                     |

|                    |           |            |                          |                                                    |                                                                                               |
|--------------------|-----------|------------|--------------------------|----------------------------------------------------|-----------------------------------------------------------------------------------------------|
| <a href="#">RA</a> | 3,940,091 | G→A        | D1058D (GAC→GAT)         | <i>MBURv2_190001</i> ←                             | LPXTG-motif cell wall anchor domain protein (fragment)                                        |
| <a href="#">RA</a> | 3,940,144 | A→T        | S1041T (TCA→ACA)         | <i>MBURv2_190001</i> ←                             | LPXTG-motif cell wall anchor domain protein (fragment)                                        |
| <a href="#">RA</a> | 3,940,738 | A→T        | S843T (TCC→ACC)          | <i>MBURv2_190001</i> ←                             | LPXTG-motif cell wall anchor domain protein (fragment)                                        |
| <a href="#">RA</a> | 3,941,854 | A→T        | S471T (TCA→ACA)          | <i>MBURv2_190001</i> ←                             | LPXTG-motif cell wall anchor domain protein (fragment)                                        |
| <a href="#">RA</a> | 4,028,796 | Δ7 bp      | intergenic (+89/+611)    | <i>yraL</i> →   ← <i>MBURv2_190083</i>             | putative methyltransferase/protein of unknown function                                        |
| <a href="#">RA</a> | 4,090,457 | G→A        | intergenic (+464/-828)   | <i>MBURv2_200002</i> →   → <i>MBURv2_210001</i>    | conserved protein of unknown function/protein of unknown function                             |
| <a href="#">RA</a> | 4,099,325 | +T         | intergenic (+194/-634)   | <i>MBURv2_210008</i> →   → <i>MBURv2_210009</i>    | conserved exported protein of unknown function/conserved exported protein of unknown function |
| <a href="#">RA</a> | 4,099,625 | 3 bp→GTG   | intergenic (+494/-332)   | <i>MBURv2_210008</i> →   → <i>MBURv2_210009</i>    | conserved exported protein of unknown function/conserved exported protein of unknown function |
| <a href="#">RA</a> | 4,262,607 | G→C        | intergenic (+111/-40)    | <i>MBURv2_5s_rRNA_1</i> →   → <i>MBURv2_210142</i> | ribosomal RNA 5s_rRNA/protein of unknown function                                             |
| <a href="#">RA</a> | 4,319,976 | N→C        | ?292C (TNT→TGT)          | <i>MBURv2_210192</i> ←                             | conserved protein of unknown function                                                         |
| <a href="#">RA</a> | 4,335,952 | A→T        | H104Q (CAT→CAA)          | <i>MBURv2_210207</i> ←                             | conserved protein of unknown function                                                         |
| <a href="#">RA</a> | 4,343,534 | N→G        | ?11L (NTG→CTG)           | <i>MBURv2_210214</i> ←                             | transposase (fragment)                                                                        |
| <a href="#">RA</a> | 4,363,037 | C→A        | A183A (GCC→GCA)          | <i>MBURv2_210234</i> →                             | conserved protein of unknown function                                                         |
| <a href="#">RA</a> | 4,371,038 | T→C        | K267E (AAA→GAA)          | <i>MBURv2_210244</i> ←                             | protein of unknown function                                                                   |
| <a href="#">JC</a> | 4,439,764 | +TTCACCTA  | coding (80/276 nt)       | <i>MBURv2_210305</i> →                             | protein of unknown function                                                                   |
| <a href="#">JC</a> | 4,466,694 | Δ4 bp      | intergenic (-76/-271)    | <i>MBURv2_210339</i> ←   → <i>speE</i>             | protein of unknown function/Spermidine synthase                                               |
| <a href="#">RA</a> | 4,516,410 | 2 bp→GC    | coding (584-585/1581 nt) | <i>MBURv2_210383</i> →                             | transposase                                                                                   |
| <a href="#">RA</a> | 4,529,979 | T→C        | R35R (CGA→CGG)           | <i>MBURv2_210391</i> ←                             | transposase                                                                                   |
| <a href="#">RA</a> | 4,530,076 | Δ1 bp      | coding (8/1104 nt)       | <i>MBURv2_210391</i> ←                             | transposase                                                                                   |
| <a href="#">RA</a> | 4,530,105 | Δ2 bp      | intergenic (-22/-138)    | <i>MBURv2_210391</i> ←   → <i>MBURv2_210392</i>    | transposase/conserved protein of unknown function                                             |
| <a href="#">RA</a> | 4,530,126 | 2 bp→AT    | intergenic (-43/-117)    | <i>MBURv2_210391</i> ←   → <i>MBURv2_210392</i>    | transposase/conserved protein of unknown function                                             |
| <a href="#">RA</a> | 4,530,130 | Δ1 bp      | intergenic (-47/-114)    | <i>MBURv2_210391</i> ←   → <i>MBURv2_210392</i>    | transposase/conserved protein of unknown function                                             |
| <a href="#">RA</a> | 4,530,166 | Δ1 bp      | intergenic (-83/-78)     | <i>MBURv2_210391</i> ←   → <i>MBURv2_210392</i>    | transposase/conserved protein of unknown function                                             |
| <a href="#">RA</a> | 4,530,739 | +C         | coding (496/519 nt)      | <i>MBURv2_210392</i> →                             | conserved protein of unknown function                                                         |
| <a href="#">RA</a> | 4,925,409 | C→G        | intergenic (+100/+153)   | <i>MBURv2_250059</i> →   ← <i>MBURv2_250060</i>    | conserved exported protein of unknown function/conserved membrane protein of unknown function |
| <a href="#">RA</a> | 4,925,434 | Δ14 bp     | intergenic (+125/+115)   | <i>MBURv2_250059</i> →   ← <i>MBURv2_250060</i>    | conserved exported protein of unknown function/conserved membrane protein of unknown function |
| <a href="#">JC</a> | 4,992,169 | 182 bp x 2 | duplication              | <i>MBURv2_250100</i> →   → <i>MBURv2_250101</i>    | conserved protein of unknown function/conserved protein of unknown function                   |
| <a href="#">RA</a> | 5,007,736 | G→A        | G42D (GGC→GAC)           | <i>MBURv2_250115</i> →                             | protein of unknown function                                                                   |
| <a href="#">RA</a> | 5,020,996 | Δ3 bp      | intergenic (-372/-138)   | <i>MBURv2_260006</i> ←   → <i>MBURv2_260007</i>    | protein of unknown function/Molybdopterin biosynthesis protein MoeB                           |
| <a href="#">RA</a> | 5,044,973 | C→T        | A354A (GCG→GCA)          | <i>dxs</i> ←                                       | 1-deoxyxylulose-5-phosphate synthase, thiamine-requiring, FAD-requiring                       |

#### Unassigned missing coverage evidence

|       | seq id | start           | end             | size      | ←reads    | reads→    | gene                                  | description                                                                                                                                                                     |
|-------|--------|-----------------|-----------------|-----------|-----------|-----------|---------------------------------------|---------------------------------------------------------------------------------------------------------------------------------------------------------------------------------|
| * * ± | MBURv2 | 82732           | 82831           | 100       | 236 [0]   | [0] 196   | <i>[MBURv2_10087]</i>                 | <i>[MBURv2_10087]</i>                                                                                                                                                           |
| * * ± | MBURv2 | 609333–609427   | 613315–613053   | 3627–3983 | 118 [114] | [0] 245   | <i>[MBURv2_20501]–MBURv2_30007</i>    | <i>[MBURv2_20501]</i> , <i>MBURv2_30001</i> , <i>MBURv2_30002</i> , <i>MBURv2_30003</i> , <i>MBURv2_30004</i> , <i>MBURv2_30005</i> , <i>MBURv2_30006</i> , <i>MBURv2_30007</i> |
| * * ± | MBURv2 | 779034–779175   | 779286–779178   | 4–253     | 116 [114] | [112] 115 | <i>[MBURv2_30143]</i>                 | <i>[MBURv2_30143]</i>                                                                                                                                                           |
| * * ± | MBURv2 | 819847–819961   | 820061          | 101–215   | 117 [111] | [0] 1398  | <i>[MBURv2_30179]</i>                 | <i>[MBURv2_30179]</i>                                                                                                                                                           |
| * * ± | MBURv2 | 820833          | 821033–820933   | 101–201   | 711 [0]   | [113] 115 | <i>mbtH/MBURv2_50001</i>              | Protein MbtH/RNA polymerase, sigma-24 subunit, ECF subfamily                                                                                                                    |
| * * ± | MBURv2 | 1353350         | 1353550–1353452 | 103–201   | 275 [0]   | [113] 116 | <i>[MBURv2_60001]</i>                 | <i>[MBURv2_60001]</i>                                                                                                                                                           |
| * * ± | MBURv2 | 1422819–1422897 | 1423331–1423035 | 139–513   | 116 [112] | [113] 115 | <i>[MBURv2_60052]–[MBURv2_60054]</i>  | <i>[MBURv2_60052]</i> , <i>MBURv2_60053</i> , <i>[MBURv2_60054]</i>                                                                                                             |
| * * ± | MBURv2 | 1680105–1680275 | 1680404–1680311 | 37–300    | 116 [113] | [114] 115 | <i>MBURv2_60275</i>                   | transposase                                                                                                                                                                     |
| * * ± | MBURv2 | 1960799         | 1960974         | 176       | 116 [114] | [0] 438   | <i>MBURv2_80115/MBURv2_90001</i>      | putative Glycosyl transferase family 2/conserved protein of unknown function                                                                                                    |
| * * ± | MBURv2 | 1964952         | 1965274–1965139 | 188–323   | 116 [113] | [113] 117 | <i>[MBURv2_90005]–[MBURv2_100001]</i> | <i>[MBURv2_90005]</i> , <i>[MBURv2_100001]</i>                                                                                                                                  |
| * * ± | MBURv2 | 1967033         | 1967223         | 191       | 442 [1]   | [114] 116 | <i>[MBURv2_100003]</i>                | <i>[MBURv2_100003]</i>                                                                                                                                                          |

|       |        |                 |                 |          |           |       |     |                                     |                                                                    |
|-------|--------|-----------------|-----------------|----------|-----------|-------|-----|-------------------------------------|--------------------------------------------------------------------|
| * - ± | MBURv2 | 1967488-1967597 | 1967778-1967771 | 175-291  | 116 [114] | [114] | 115 | [MBURv2_120001]                     | [MBURv2_120001]                                                    |
| * - ± | MBURv2 | 2139320-2140548 | 2141155-2140652 | 105-1836 | 116 [114] | [114] | 115 | MBURv2_120145-<br>MBURv2_120146     | MBURv2_120145, MBURv2_120146                                       |
| * - ± | MBURv2 | 3249728-3250761 | 3250930-3250862 | 102-1203 | 115 [114] | [114] | 115 | [MBURv2_130999]-<br>[MBURv2_140001] | [MBURv2_130999], MBURv2_131000, [MBURv2_140001]                    |
| * - ± | MBURv2 | 3252480         | 3253310-3252580 | 101-831  | 180 [0]   | [114] | 118 | [MBURv2_150001]                     | [MBURv2_150001]                                                    |
| * - ± | MBURv2 | 3264171-3264319 | 3264823-3264420 | 102-653  | 115 [113] | [113] | 115 | [MBURv2_150015]-<br>[MBURv2_160002] | [MBURv2_150015], MBURv2_160001, [MBURv2_160002]                    |
| * - ± | MBURv2 | 3439232-3439434 | 3439984-3439745 | 312-753  | 115 [113] | [114] | 115 | MBURv2_160164                       | transposase                                                        |
| * - ± | MBURv2 | 3907685-3907828 | 3908084         | 257-400  | 115 [114] | [114] | 116 | [MBURv2_160578]-<br>[MBURv2_170001] | [MBURv2_160578], [MBURv2_170001]                                   |
| * - ± | MBURv2 | 3913037-3913043 | 3913143         | 101-107  | 125 [113] | [0]   | 183 | [MBURv2_180001]                     | [MBURv2_180001]                                                    |
| * - ± | MBURv2 | 3919334-3920026 | 3920114-3920071 | 46-781   | 117 [113] | [114] | 118 | [MBURv2_180001]-<br>[MBURv2_180002] | [MBURv2_180001], [MBURv2_180002]                                   |
| * - ± | MBURv2 | 3939119-3939197 | 3939334-3939306 | 110-216  | 121 [108] | [114] | 118 | [MBURv2_180009]-<br>[MBURv2_190002] | [MBURv2_180009], [MBURv2_180010], [MBURv2_190001], [MBURv2_190002] |
| * - ± | MBURv2 | 4088265-4088333 | 4088434         | 102-170  | 116 [114] | [0]   | 773 | [MBURv2_190133]                     | [MBURv2_190133]                                                    |
| * - ± | MBURv2 | 4090655         | 4090819-4090755 | 101-165  | 1040 [0]  | [113] | 118 | MBURv2_200002/MBURv2_210001         | conserved protein of unknown function/protein of unknown function  |
| * - ± | MBURv2 | 4611954-4612178 | 4613338-4612575 | 398-1385 | 115 [114] | [114] | 115 | [MBURv2_210490]-<br>[MBURv2_210493] | [MBURv2_210490], MBURv2_210491, MBURv2_210492, [MBURv2_210493]     |
| * - ± | MBURv2 | 4710530-4712611 | 4713681-4712713 | 103-3152 | 115 [113] | [112] | 116 | [MBURv2_210584]-<br>MBURv2_220001   | [MBURv2_210584], MBURv2_210585, MBURv2_210586, MBURv2_220001       |
| * - ± | MBURv2 | 4744116         | 4744548         | 433      | 115 [113] | [113] | 116 | [ruvB]                              | [ruvB]                                                             |
| * - ± | MBURv2 | 4755115-4755142 | 4755674         | 533-560  | 136 [97]  | [0]   | 260 | [MBURv2_230012]                     | [MBURv2_230012]                                                    |
| * - ± | MBURv2 | 4866712-4866866 | 4867422-4867095 | 230-711  | 115 [113] | [113] | 115 | [MBURv2_240107]-<br>[MBURv2_250001] | [MBURv2_240107], [MBURv2_250001]                                   |
| * - ± | MBURv2 | 5012842-5013596 | 5015094-5014316 | 721-2253 | 117 [114] | [114] | 116 | MBURv2_250123-<br>MBURv2_260001     | MBURv2_250123, MBURv2_260001                                       |

#### Unassigned new junction evidence...

|       | seq id | position  | reads (cov) | reads (cov) | score   | skew | freq  | annotation              | gene                        | product                                                                             |
|-------|--------|-----------|-------------|-------------|---------|------|-------|-------------------------|-----------------------------|-------------------------------------------------------------------------------------|
| * - ± | MBURv2 | 1 =       | 0 (0.000)   | 232 (0.820) | 179/566 | 0.4  | 100%  | intergenic (-/115)      | -/MBURv2_10001              | -/protein of unknown function                                                       |
| * - ± | MBURv2 | = 82731   | 0 (0.000)   | 134 (0.700) | 101/382 | 1.0  | 57.0% | coding (4563/4566 nt)   | MBURv2_10087                | conserved protein of unknown fur                                                    |
| * - ± | MBURv2 | 82832 =   | 0 (0.000)   | 134 (0.700) | 101/382 | 1.0  | 57.0% | intergenic (+98/-92)    | MBURv2_10087/waaA           | conserved protein of unknown function/3-deoxy-D-manno-octulo acid transferase       |
| * - ± | MBURv2 | 4562967 = | 300 (1.050) | 283 (0.990) | 208/568 | 0.1  | 96.9% | intergenic (+222/-408)  | MBURv2_210430/MBURv2_210431 | protein of unknown function/cons protein of unknown function                        |
| * - ± | MBURv2 | 613316 =  | 0 (0.000)   | 203 (0.870) | 141/466 | 0.6  | 68.7% | intergenic (-1091/+123) | MBURv2_30007/MBURv2_30008   | protein of unknown function/Coby acid ac-diamide synthase                           |
| * - ± | MBURv2 | 1705944 = | 226 (0.790) | 162 (1.020) | 118/316 | 0.1  | 100%  | intergenic (+257/-137)  | MBURv2_60309/MBURv2_60310   | Glutathione peroxidase/protein of unknown function                                  |
| * - ± | MBURv2 | 819638 =  | NA (NA)     | 266 (0.930) | 199/568 | 0.2  | 100%  | intergenic (+27/+28)    | MBURv2_30178/MBURv2_30179   | conserved protein of unknown function/protein of unknown funct                      |
| * - ± | MBURv2 | = 935633  | 9 (0.030)   | 266 (0.940) | 200/562 | 0.2  | 98.5% | coding (1663/2583 nt)   | MBURv2_50104                | putative Sensor histidine kinase/response regulator                                 |
| * - ± | MBURv2 | 820062 =  | 0 (0.000)   | 141 (0.860) | 116/328 | 0.2  | 67.0% | intergenic (-139/+413)  | MBURv2_30179/mbtH           | protein of unknown function/Prote MbtH                                              |
| * - ± | MBURv2 | 4754855 = | 139 (0.840) | 162 (1.020) | 118/316 | 0.1  | 100%  | coding (54/777 nt)      | MBURv2_230012               | transposase (fragment)                                                              |
| * - ± | MBURv2 | = 820832  | 0 (0.000)   | 162 (1.020) | 118/316 | 0.1  | 100%  | intergenic (-139/+319)  | mbtH/MBURv2_50001           | Protein MbtH/RNA polymerase, sigma-24 subunit, ECF subfamily                        |
| * - ± | MBURv2 | = 3254366 | NA (NA)     | 266 (0.930) | 199/568 | 0.2  | 100%  | intergenic (-450/+554)  | MBURv2_150001/MBURv2_150002 | putative reverse transcriptase/pro of unknown function                              |
| * - ± | MBURv2 | 884705 =  | 0 (0.000)   | 266 (0.930) | 199/568 | 0.2  | 100%  | coding (621/984 nt)     | rpoS                        | RNA polymerase, sigma S (sigma factor)                                              |
| * - ± | MBURv2 | = 945544  | NA (NA)     | 266 (0.940) | 200/562 | 0.2  | 98.5% | intergenic (+745/-233)  | hpsi/MBURv2_50110           | Hexulose-6-phosphate synthase ; isomerase/putative transport prot (MFS superfamily) |
| * - ± | MBURv2 | = 884706  | 4 (0.010)   | 266 (0.940) | 200/562 | 0.2  | 98.5% | coding (622/984 nt)     | rpoS                        | RNA polymerase, sigma S (sigma factor)                                              |
| * - ± | MBURv2 | 945238 =  | NA (NA)     | 266 (0.940) | 200/562 | 0.2  | 98.5% | intergenic (+439/-539)  | hpsi/MBURv2_50110           | Hexulose-6-phosphate synthase ; isomerase/putative transport prot (MFS superfamily) |
| * - ± | MBURv2 | 935626 =  | 11 (0.040)  | 266 (0.940) | 200/562 | 0.2  | 98.5% | coding (1656/2583 nt)   | MBURv2_50104                | putative Sensor histidine                                                           |



|   |                  |             |             |         |     |       |                        |                                    |                                                                                            |
|---|------------------|-------------|-------------|---------|-----|-------|------------------------|------------------------------------|--------------------------------------------------------------------------------------------|
| * |                  |             | 195 (0.680) | 155/568 | 0.9 | 94.7% |                        |                                    | kinase/response regulator                                                                  |
| ? | MBURv2 = 1479206 | NA (NA)     |             |         |     |       | intergenic (-67/-136)  | <i>MBURv2_60098/ndh</i>            | transposase (fragment)/NADH dehydrogenase                                                  |
| ? | MBURv2 1055534 = | NA (NA)     | 307 (1.080) | 241/568 | 0.0 | 66.9% | intergenic (+204/-928) | <i>MBURv2_50193/MBURv2_50194</i>   | AAA ATPase central domain protein/conserved protein of unkn function                       |
| ? | MBURv2 = 2592714 | 152 (0.530) |             |         |     |       | coding (356/795 nt)    | <i>MBURv2_130386</i>               | protein of unknown function                                                                |
| ? | MBURv2 = 1055842 | NA (NA)     |             |         |     |       | intergenic (+512/-620) | <i>MBURv2_50193/MBURv2_50194</i>   | AAA ATPase central domain protein/conserved protein of unkn function                       |
| * |                  |             | 275 (0.960) | 204/568 | 0.2 | 100%  |                        |                                    | conserved protein of unknown function/protein of unknown funct                             |
| ? | MBURv2 = 1353349 | 0 (0.000)   |             |         |     |       | intergenic (-42/+96)   | <i>MBURv2_50460/MBURv2_60001</i>   | conserved protein of unknown function/putative NAD-dependent epimerase/dehydratase         |
| ? | MBURv2 = 1521363 | 320 (1.120) |             |         |     |       | intergenic (+43/+261)  | <i>MBURv2_60143/MBURv2_60144</i>   | conserved exported protein of unknown function/Retron-type rev transcriptase               |
| * |                  |             | 358 (1.290) | 242/552 | 0.0 | 58.3% |                        |                                    | putative Glycosyl transferase fam 2/conserved protein of unknown function                  |
| ? | MBURv2 2718373 = | 202 (0.730) |             |         |     |       | intergenic (-158/-716) | <i>MBURv2_130515/MBURv2_130516</i> | protein of unknown function                                                                |
| ? | MBURv2 1960975 = | 0 (0.000)   | 435 (1.550) | 226/560 | 0.0 | 100%  | intergenic (+434/-27)  | <i>MBURv2_80115/MBURv2_90001</i>   | conserved protein of unknown function/transposase                                          |
| ? | MBURv2 = 1967032 | 0 (0.000)   |             |         |     |       | coding (102/111 nt)    | <i>MBURv2_100003</i>               | transposase (fragment)/conserve protein of unknown function                                |
| ? | MBURv2 2077070 = | NA (NA)     |             |         |     |       | intergenic (-17/+30)   | <i>MBURv2_120096/MBURv2_120097</i> | conserved protein of unknown function/H repeat-associated prot YhhI                        |
| * |                  |             | 235 (0.860) | 172/542 | 0.4 | 100%  |                        |                                    | fumarate hydratase (fumarase C),aerobic Class II                                           |
| ? | MBURv2 4755675 = | 0 (0.000)   |             |         |     |       | intergenic (+97/-666)  | <i>MBURv2_230012/MBURv2_240001</i> | protein of unknown function                                                                |
| ? | MBURv2 2227988 = | 260 (0.910) |             |         |     |       | intergenic (-32/-69)   | <i>MBURv2_130069/yhhI</i>          | conserved protein of unknown function/protein of unknown function                          |
| * |                  |             | 311 (1.100) | 221/562 | 0.1 | 69.8% |                        |                                    | conserved protein of unknown function/protein of unknown function                          |
| ? | MBURv2 3098491 = | 12 (0.040)  |             |         |     |       | coding (160/1404 nt)   | <i>fumC</i>                        | exported protein of unknown function/putative reverse transcrip                            |
| ? | MBURv2 2401865 = | 292 (1.020) | 121 (0.720) | 76/336  | 1.7 | 58.4% | intergenic (-180/+29)  | <i>MBURv2_130208/MBURv2_130209</i> | conserved protein of unknown function/conserved protein of unk function                    |
| ? | MBURv2 = 5067378 | 0 (0.000)   |             |         |     |       | intergenic (+84/-)     | <i>MBURv2_260042/-</i>             | transposase                                                                                |
| ? | MBURv2 2742602 = | NA (NA)     |             |         |     |       | coding (3259/3300 nt)  | <i>MBURv2_130533</i>               | transposase (fragment)                                                                     |
| * |                  |             | 305 (1.070) | 223/568 | 0.1 | 93.3% |                        |                                    | protein of unknown function                                                                |
| ? | MBURv2 = 3098498 | 22 (0.080)  |             |         |     |       | coding (167/1404 nt)   | <i>fumC</i>                        | protein of unknown function                                                                |
| ? | MBURv2 = 3252479 | 0 (0.000)   |             |         |     |       | intergenic (-715/+187) | <i>MBURv2_140002/MBURv2_150001</i> | protein of unknown function/prote unknown function                                         |
| * |                  |             | 174 (0.620) | 106/558 | 2.8 | 52.4% |                        |                                    | conserved protein of unknown function/protein of unknown funct                             |
| ? | MBURv2 3442789 = | 316 (1.130) |             |         |     |       | intergenic (+768/+616) | <i>MBURv2_160166/MBURv2_160167</i> | transposase                                                                                |
| ? | MBURv2 3435297 = | 618 (2.170) | 315 (1.110) | 207/566 | 0.1 | 50.4% | coding (756/1581 nt)   | <i>MBURv2_160159</i>               | transposase (fragment)                                                                     |
| ? | MBURv2 4343881 = | 5 (0.020)   |             |         |     |       | coding (748/1017 nt)   | <i>MBURv2_210215</i>               | protein of unknown function                                                                |
| ? | MBURv2 3912891 = | 272 (0.950) | 650 (2.340) | 247/554 | 0.0 | 63.8% | coding (143/489 nt)    | <i>MBURv2_170005</i>               | protein of unknown function                                                                |
| ? | MBURv2 = 3913670 | 485 (1.700) |             |         |     |       | coding (6340/6870 nt)  | <i>MBURv2_180001</i>               | protein of unknown function                                                                |
| ? | MBURv2 4088435 = | 0 (0.000)   |             |         |     |       | intergenic (+133/+118) | <i>MBURv2_190133/MBURv2_200001</i> | conserved protein of unknown function/protein of unknown funct                             |
| * |                  |             | 764 (2.750) | 172/554 | 0.5 | 100%  |                        |                                    | conserved protein of unknown function/protein of unknown funct                             |
| ? | MBURv2 = 4090654 | 0 (0.000)   |             |         |     |       | intergenic (+661/-631) | <i>MBURv2_200002/MBURv2_210001</i> | conserved protein of unknown function/protein of unknown funct                             |
| ? | MBURv2 = 4090654 | 0 (0.000)   |             |         |     |       | intergenic (+661/-631) | <i>MBURv2_200002/MBURv2_210001</i> | conserved protein of unknown function/General secretion pathw: protein E (Modular protein) |
| * |                  |             | 143 (0.520) | 115/546 | 2.2 | 55.0% |                        |                                    |                                                                                            |
| ? | MBURv2 4095078 = | 234 (0.850) |             |         |     |       | intergenic (+71/-266)  | <i>MBURv2_210005/MBURv2_210006</i> |                                                                                            |
